# Supplementary material
Source: HighWire-hosted journal article supplement (https://nutrition.bmj.com/content/bmjnph-2020-000198)
Supplement: inline-supplementary-material-1 [file inline-supplementary-material-1.pdf]

## SUPPLEMENTARY TABLES

**Supplementary Table 1. Estimates of relative risk and 95% confidence intervals (CIs) of diseases of interest for one medium serving/day increase in pasta meal intake variables**

| HR (95% CI) |                      | Residual Total Pasta Meal Intake | Pasta/100GL Ratio | Pasta/1000kcal Energy Ratio | Residual Total Spaghetti Meal Intake |
|-------------|----------------------|----------------------------------|-------------------|-----------------------------|--------------------------------------|
| Diabetes    | Model 1 <sup>a</sup> | 1.11 (1.01, 1.22)                | 1.28 (1.15, 1.41) | 1.22 (1.04, 1.43)           | 0.98 (0.88, 1.10)                    |
|             | Model 2 <sup>b</sup> | 1.08 (0.98, 1.18)                | 1.10 (0.99, 1.22) | 1.16 (0.99, 1.37)           | 1.02 (0.92, 1.14)                    |
|             | Model 3 <sup>c</sup> | 1.06 (0.97, 1.17)                | 1.09 (0.98, 1.21) | 1.12 (0.95, 1.32)           | 1.04 (0.94, 1.16)                    |
| CHD         | Model 1 <sup>a</sup> | 0.95 (0.80, 1.13)                | 1.01 (0.84, 1.21) | 0.84 (0.63, 1.12)           | 0.83 (0.68, 1.01)                    |
|             | Model 2 <sup>b</sup> | 0.94 (0.80, 1.12)                | 0.89 (0.74, 1.07) | 0.82 (0.61, 1.09)           | 0.86 (0.70, 1.05)                    |
|             | Model 3 <sup>c</sup> | 0.93 (0.77, 1.11)                | 0.90 (0.74, 1.09) | 0.79 (0.59, 1.07)           | 0.88 (0.72, 1.09)                    |
| Stroke      | Model 1 <sup>a</sup> | 0.69 (0.56, 0.85)                | 0.73 (0.58, 0.90) | 0.54 (0.39, 0.76)           | 0.59 (0.46, 0.75)                    |
|             | Model 2 <sup>b</sup> | 0.70 (0.57, 0.86)                | 0.67 (0.53, 0.83) | 0.54 (0.38, 0.76)           | 0.61 (0.48, 0.78)                    |
|             | Model 3 <sup>c</sup> | 0.71 (0.58, 0.88)                | 0.69 (0.55, 0.86) | 0.56 (0.31, 0.78)           | 0.64 (0.50, 0.82)                    |
| ASCVD       | Model 1 <sup>a</sup> | 0.85 (0.74, 0.97)                | 0.89 (0.77, 1.02) | 0.72 (0.58, 0.90)           | 0.74 (0.63, 0.87)                    |
|             | Model 2 <sup>b</sup> | 0.84 (0.74, 0.97)                | 0.80 (0.69, 0.93) | 0.71 (0.57, 0.88)           | 0.76 (0.65, 0.89)                    |
|             | Model 3 <sup>c</sup> | 0.85 (0.74, 0.98)                | 0.82 (0.70, 0.95) | 0.72 (0.57, 0.90)           | 0.80 (0.68, 0.94)                    |

<sup>a</sup> Model 1 adjusted for age, race, region, and study indicators

<sup>b</sup> Model 2 adjusted for age, race, region, study indicators, BMI, total energy intake, and percent energy from carbohydrates

<sup>c</sup> Model 3 adjusted for age, race, region, study indicators, BMI, total energy intake, percent energy from carbohydrates, smoking status, alcohol consumption, physical activity, healthy eating index (HEI) 2005, and family history of CHD and stroke.

**Supplementary Table 2. Estimates of relative risk and 95% confidence intervals (CIs) of diseases of interest with additional adjustment of potential dietary confounders**

|                                          | Residual Total Pasta Meal Intake Quartiles |                   |                   |                   | P-value<br>for trend |
|------------------------------------------|--------------------------------------------|-------------------|-------------------|-------------------|----------------------|
|                                          | Q1                                         | Q2                | Q3                | Q4                |                      |
| HR (95% CI) for risk of <b>diabetes</b>  |                                            |                   |                   |                   |                      |
| Model 3*                                 | 1.00                                       | 0.97 (0.92, 1.03) | 1.00 (0.94, 1.05) | 1.02 (0.96, 1.07) | 0.328                |
| Model 3 + fiber                          | 1.00                                       | 0.97 (0.92, 1.03) | 0.99 (0.94, 1.05) | 1.02 (0.96, 1.08) | 0.294                |
| Model 3 + total sugar                    | 1.00                                       | 0.97 (0.92, 1.03) | 1.00 (0.94, 1.06) | 1.03 (0.97, 1.09) | 0.195                |
| Model 3 + added sugar                    | 1.00                                       | 0.97 (0.92, 1.03) | 1.00 (0.94, 1.06) | 1.02 (0.96, 1.08) | 0.263                |
| Model 3 + non-whole grain                | 1.00                                       | 0.97 (0.92, 1.03) | 1.00 (0.94, 1.05) | 1.02 (0.96, 1.08) | 0.306                |
| Model 3 + whole grain                    | 1.00                                       | 0.97 (0.91, 1.02) | 0.99 (0.93, 1.05) | 1.01 (0.95, 1.06) | 0.537                |
| Model 3 + total cheese                   | 1.00                                       | 0.97 (0.92, 1.03) | 1.00 (0.94, 1.05) | 1.02 (0.96, 1.07) | 0.315                |
| Model 3 + total tomato                   | 1.00                                       | 0.97 (0.91, 1.02) | 0.99 (0.93, 1.05) | 1.00 (0.95, 1.06) | 0.575                |
| Model 3 + frequency of eating vegetables | 1.00                                       | 0.97 (0.92, 1.03) | 1.00 (0.94, 1.06) | 1.02 (0.96, 1.08) | 0.288                |
| HR (95% CI) for risk of <b>CHD</b>       |                                            |                   |                   |                   |                      |
| Model 3*                                 | 1.00                                       | 0.99 (0.90, 1.09) | 1.02 (0.93, 1.12) | 0.91 (0.83, 1.00) | 0.058                |
| Model 3 + fiber                          | 1.00                                       | 0.99 (0.90, 1.09) | 1.02 (0.93, 1.12) | 0.91 (0.83, 1.00) | 0.061                |
| Model 3 + total sugar                    | 1.00                                       | 0.99 (0.90, 1.09) | 1.02 (0.93, 1.13) | 0.92 (0.83, 1.01) | 0.078                |
| Model 3 + added sugar                    | 1.00                                       | 0.99 (0.90, 1.09) | 1.02 (0.93, 1.12) | 0.92 (0.83, 1.01) | 0.072                |
| Model 3 + non-whole grain                | 1.00                                       | 0.99 (0.90, 1.09) | 1.03 (0.93, 1.13) | 0.92 (0.83, 1.02) | 0.094                |
| Model 3 + whole grain                    | 1.00                                       | 0.99 (0.90, 1.08) | 1.02 (0.93, 1.12) | 0.91 (0.83, 1.00) | 0.052                |
| Model 3 + total cheese                   | 1.00                                       | 0.99 (0.90, 1.09) | 1.02 (0.93, 1.12) | 0.91 (0.83, 1.00) | 0.060                |
| Model 3 + total tomato                   | 1.00                                       | 0.99 (0.90, 1.08) | 1.02 (0.92, 1.12) | 0.90 (0.82, 1.00) | 0.040                |
| Model 3 + frequency of eating vegetables | 1.00                                       | 0.99 (0.90, 1.08) | 1.02 (0.93, 1.12) | 0.91 (0.82, 1.00) | 0.042                |
| HR (95% CI) for risk of <b>stroke</b>    |                                            |                   |                   |                   |                      |
| Model 3*                                 | 1.00                                       | 0.97 (0.88, 1.08) | 1.00 (0.91, 1.11) | 0.84 (0.75, 0.93) | 0.001                |
| Model 3 + fiber                          | 1.00                                       | 0.97 (0.88, 1.08) | 1.00 (0.91, 1.11) | 0.84 (0.75, 0.93) | 0.001                |
| Model 3 + total sugar                    | 1.00                                       | 0.98 (0.89, 1.09) | 1.01 (0.91, 1.12) | 0.85 (0.76, 0.95) | 0.004                |
| Model 3 + added sugar                    | 1.00                                       | 0.98 (0.88, 1.08) | 1.01 (0.91, 1.12) | 0.84 (0.75, 0.94) | 0.002                |
| Model 3 + non-whole grain                | 1.00                                       | 0.98 (0.88, 1.08) | 1.01 (0.91, 1.12) | 0.84 (0.76, 0.94) | 0.002                |
| Model 3 + whole grain                    | 1.00                                       | 0.97 (0.88, 1.08) | 1.00 (0.91, 1.11) | 0.84 (0.75, 0.93) | 0.001                |

|                                             |      |                   |                   |                   |       |
|---------------------------------------------|------|-------------------|-------------------|-------------------|-------|
| Model 3 + total cheese                      | 1.00 | 0.98 (0.88, 1.08) | 1.01 (0.91, 1.11) | 0.84 (0.75, 0.93) | 0.001 |
| Model 3 + total tomato                      | 1.00 | 0.98 (0.88, 1.08) | 1.01 (0.91, 1.12) | 0.84 (0.75, 0.94) | 0.002 |
| Model 3 + frequency of eating vegetables    | 1.00 | 0.97 (0.88, 1.08) | 1.00 (0.91, 1.11) | 0.83 (0.75, 0.93) | 0.001 |
| <b>HR (95% CI) for risk of <u>ASCVD</u></b> |      |                   |                   |                   |       |
| Model 3*                                    | 1.00 | 0.99 (0.92, 1.06) | 1.03 (0.96, 1.11) | 0.89 (0.83, 0.96) | 0.002 |
| Model 3 + fiber                             | 1.00 | 0.98 (0.92, 1.06) | 1.03 (0.96, 1.10) | 0.89 (0.83, 0.96) | 0.002 |
| Model 3 + total sugar                       | 1.00 | 0.99 (0.92, 1.06) | 1.04 (0.96, 1.11) | 0.90 (0.83, 0.97) | 0.006 |
| Model 3 + added sugar                       | 1.00 | 0.99 (0.92, 1.06) | 1.03 (0.96, 1.11) | 0.90 (0.83, 0.97) | 0.003 |
| Model 3 + non-whole grain                   | 1.00 | 0.99 (0.92, 1.06) | 1.04 (0.96, 1.11) | 0.90 (0.84, 0.97) | 0.006 |
| Model 3 + whole grain                       | 1.00 | 0.99 (0.92, 1.06) | 1.03 (0.96, 1.11) | 0.89 (0.83, 0.96) | 0.002 |
| Model 3 + total cheese                      | 1.00 | 0.99 (0.92, 1.06) | 1.03 (0.96, 1.11) | 0.89 (0.83, 0.96) | 0.002 |
| Model 3 + total tomato                      | 1.00 | 0.99 (0.92, 1.06) | 1.03 (0.96, 1.10) | 0.89 (0.83, 0.96) | 0.002 |
| Model 3 + frequency of eating vegetables    | 1.00 | 0.98 (0.92, 1.06) | 1.03 (0.96, 1.10) | 0.89 (0.82, 0.95) | 0.001 |

\* Model 3 adjusted for age, race, region, study indicators, BMI, total energy intake, percent energy from carbohydrates, smoking status, alcohol consumption, physical activity, healthy eating index (HEI) 2005, and family history of the respective outcome.

**Supplementary Table 3. Estimates of relative risk and 95% CIs of diseases of interest according to quartiles of residual spaghetti meal intake from Model 3\***

|          | Residual Spaghetti Meal Intake Quartiles |                   |                   |                   | P-value for trend |
|----------|------------------------------------------|-------------------|-------------------|-------------------|-------------------|
|          | Q1                                       | Q2                | Q3                | Q4                |                   |
| Diabetes | 1.00                                     | 0.98 (0.93, 1.04) | 1.01 (0.95, 1.07) | 1.02 (0.97, 1.08) | 0.223             |
| CHD      | 1.00                                     | 0.99 (0.90, 1.08) | 0.98 (0.89, 1.08) | 0.92 (0.84, 1.02) | 0.084             |
| Stroke   | 1.00                                     | 0.98 (0.89, 1.08) | 1.01 (0.91, 1.12) | 0.84 (0.76, 0.94) | 0.001             |
| ASCVD    | 1.00                                     | 0.98 (0.92, 1.06) | 1.01 (0.94, 1.08) | 0.90 (0.84, 0.97) | 0.005             |

\* Model adjusted for age, race, region, study indicators, BMI, total energy intake, percent energy from carbohydrates, smoking status, alcohol consumption, physical activity, HEI 2005, and family history of the respective outcome.

**Supplementary Table 4. Estimates of relative risk and 95% CIs of diseases of interest according to quartiles of residual pasta meal intake from Model 3 using age as time-scale**

|                      | Residual Total Pasta Meal Intake Quartiles |                   |                   |                   | P-value for trend |
|----------------------|--------------------------------------------|-------------------|-------------------|-------------------|-------------------|
|                      | Q1                                         | Q2                | Q3                | Q4                |                   |
|                      | HR (95% CI) for risk of <b>diabetes</b>    |                   |                   |                   |                   |
| Model 1 <sup>a</sup> | 1.00                                       | 0.92 (0.87, 0.97) | 0.94 (0.89, 1.00) | 1.01 (0.96, 1.06) | 0.230             |
| Model 2 <sup>b</sup> | 1.00                                       | 0.97 (0.92, 1.03) | 1.00 (0.94, 1.06) | 1.02 (0.97, 1.08) | 0.191             |
| Model 3 <sup>c</sup> | 1.00                                       | 0.97 (0.91, 1.02) | 0.99 (0.93, 1.05) | 1.01 (0.96, 1.07) | 0.399             |
|                      | HR (95% CI) for risk of <b>CHD</b>         |                   |                   |                   |                   |
| Model 1 <sup>a</sup> | 1.00                                       | 1.01 (0.92, 1.09) | 1.03 (0.94, 1.12) | 0.94 (0.86, 1.03) | 0.188             |
| Model 2 <sup>b</sup> | 1.00                                       | 1.01 (0.93, 1.11) | 1.03 (0.94, 1.13) | 0.94 (0.86, 1.03) | 0.139             |
| Model 3 <sup>c</sup> | 1.00                                       | 0.98 (0.90, 1.08) | 1.01 (0.92, 1.11) | 0.91 (0.82, 1.00) | 0.050             |
|                      | HR (95% CI) for risk of <b>stroke</b>      |                   |                   |                   |                   |
| Model 1 <sup>a</sup> | 1.00                                       | 0.95 (0.87, 1.05) | 0.97 (0.89, 1.07) | 0.82 (0.74, 0.91) | <0.001            |
| Model 2 <sup>b</sup> | 1.00                                       | 0.97 (0.88, 1.07) | 0.99 (0.90, 1.09) | 0.83 (0.75, 0.92) | <0.001            |
| Model 3 <sup>c</sup> | 1.00                                       | 0.97 (0.87, 1.07) | 1.00 (0.90, 1.10) | 0.83 (0.75, 0.92) | 0.001             |
|                      | HR (95% CI) for risk of <b>ASCVD</b>       |                   |                   |                   |                   |
| Model 1 <sup>a</sup> | 1.00                                       | 0.98 (0.92, 1.04) | 1.01 (0.95, 1.08) | 0.90 (0.84, 0.96) | 0.003             |
| Model 2 <sup>b</sup> | 1.00                                       | 0.99 (0.92, 1.06) | 1.02 (0.95, 1.09) | 0.90 (0.84, 0.96) | 0.002             |
| Model 3 <sup>c</sup> | 1.00                                       | 0.98 (0.91, 1.05) | 1.02 (0.95, 1.10) | 0.89 (0.82, 0.95) | 0.001             |

<sup>a</sup> Model 1 adjusted for age, race, region, and study indicators

<sup>b</sup> Model 2 adjusted for age, race, region, study indicators, BMI, total energy intake, and percent energy from carbohydrates

<sup>c</sup> Model 3 adjusted for age, race, region, study indicators, BMI, total energy intake, percent energy from carbohydrates, smoking status, alcohol consumption, physical activity, HEI 2005, and family history of the respective outcome.
